# Supplementary material for: Loop-Mediated Isothermal Amplification for the Fast Detection of Bonamia ostreae and Bonamia exitiosa in Flat Oysters
Source: MDPI journal article supplement (doi:10.3390/pathogens13020132), 2024-01-30

**Figure S4.** Accuracy tests. Loop-mediated isothermal amplification of *Bonamia ostreae* and *B. exitiosa* gDNA using either the species-specific actin LAMP assays or the generic *Bonamia* sp. 18S LAMP assay in a Gene instrument. The time of positivity (Tp), amplification, and anneal derivative are shown for each LAMP test. NA: no amplification.

#### A) *Bonamia ostreae* actin LAMP assay

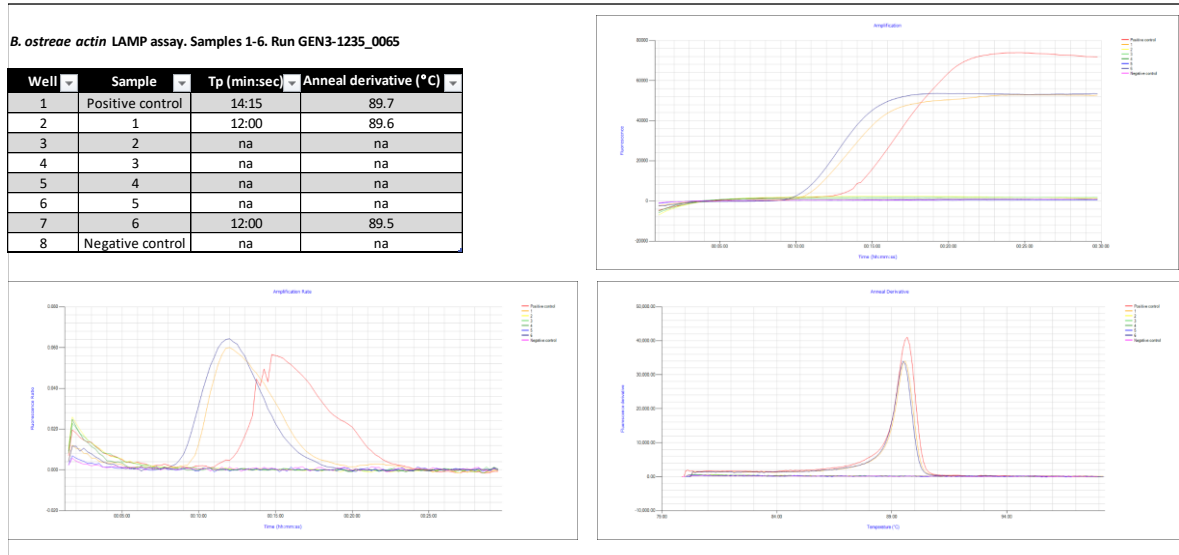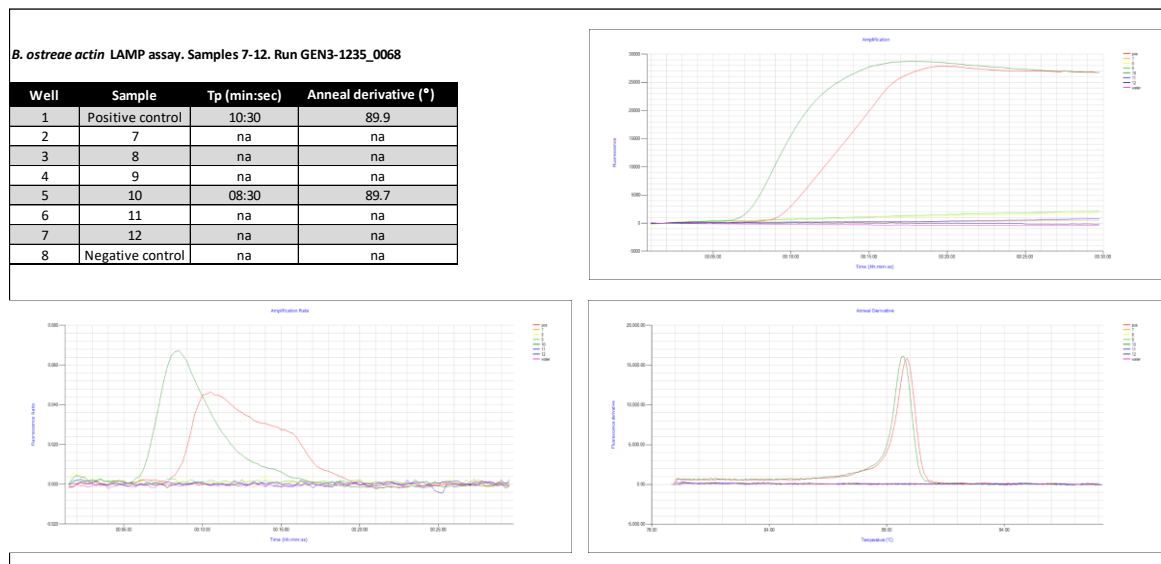

***B. ostreae* actin LAMP assay. Samples 13-18. Run GEN3-1235\_0063**

| Well | Sample           | Tp (min:sec) | Anneal derivative (°) |
|------|------------------|--------------|-----------------------|
| 1    | Positive control | 10:30        | 89.8                  |
| 2    | 13               | na           | na                    |
| 3    | 14               | 16:45        | 89.5                  |
| 4    | 15               | 09:00        | 89.7                  |
| 5    | 16               | 08:30        | 89.6                  |
| 6    | 17               | na           | na                    |
| 7    | 18               | 09:00        | 89.6                  |
| 8    | Negative control | na           | na                    |

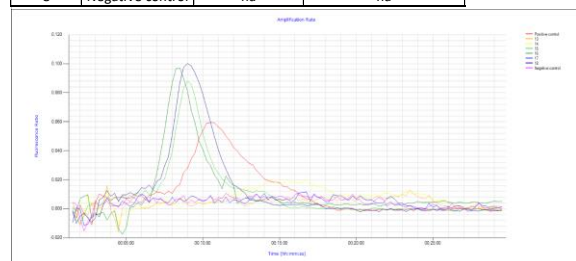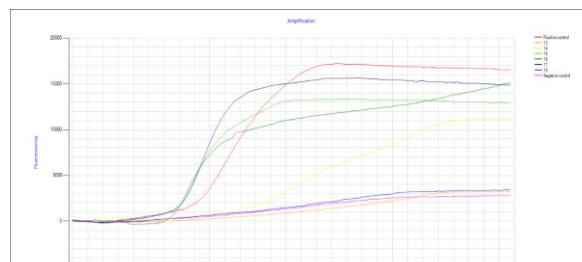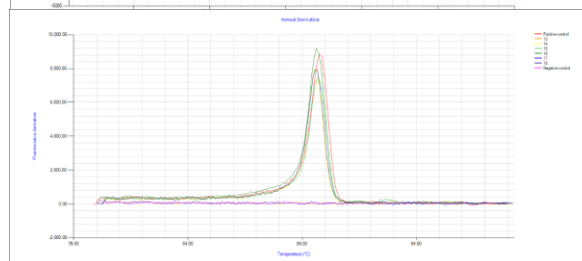

***B. ostreae* actin LAMP assay. Samples 19-24. Run GEN3-1235\_0064**

| Well | Sample           | Tp (min:sec) | Anneal derivative (°) |
|------|------------------|--------------|-----------------------|
| 1    | Positive control | 16:00        | 89.9                  |
| 2    | 19               | 07:45        | 89.7                  |
| 3    | 20               | na           | na                    |
| 4    | 21               | na           | na                    |
| 5    | 22               | na           | na                    |
| 6    | 23               | 08:15        | 89.8                  |
| 7    | 24               | 09:00        | 89.6                  |
| 8    | Negative control | na           | na                    |

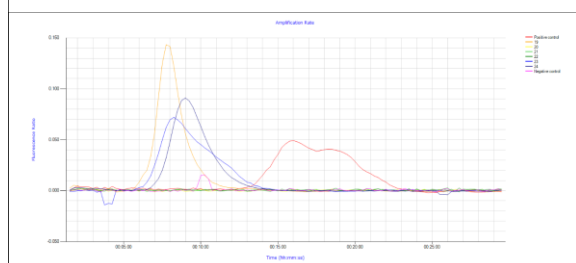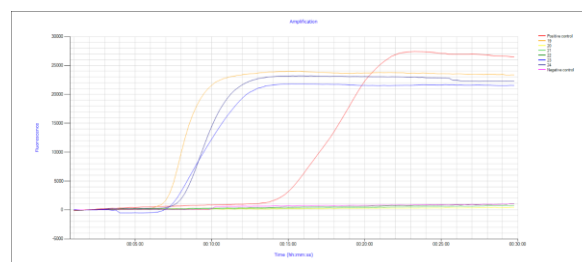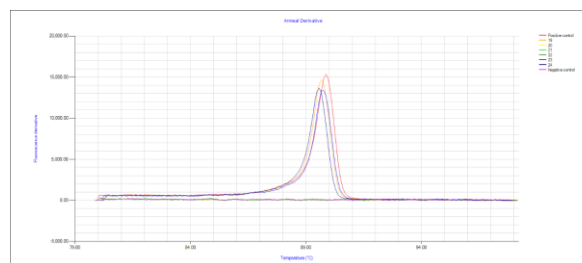

B) *Bonamia exitiosa* actin LAMP assay.

*B. exitiosa* actin LAMP assay. Samples 1-6. Run GEN2-1167\_0161 (A)

| Well | Sample           | Tp (min:sec) | Anneal derivative (°C) |
|------|------------------|--------------|------------------------|
| 1    | 1                | 11:00        | 86.8                   |
| 2    | 2                | na           | na                     |
| 3    | 3                | 17:30        | 86.8                   |
| 4    | 4                | na           | na                     |
| 5    | 5                | na           | na                     |
| 6    | 6                | na           | na                     |
| 7    | Positive control | 09:15        | 87.1                   |
| 8    | Negative control | na           | na                     |

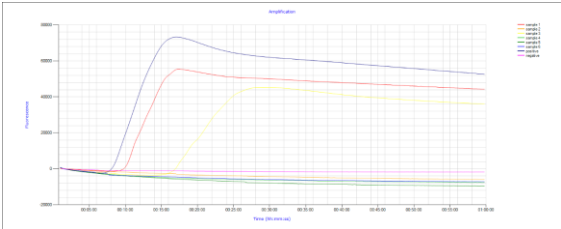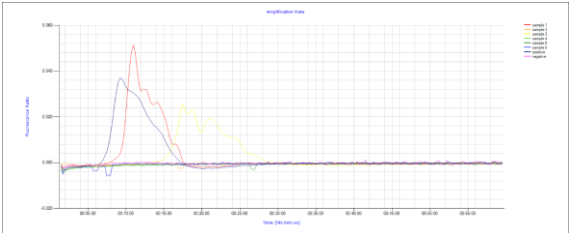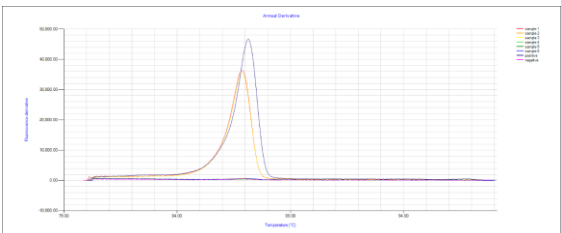

*B. exitiosa* actin LAMP assay. Samples 7-12. Run GEN3-1235\_0069

| Well | Sample           | Tp (min:sec) | Anneal derivative (°C) |
|------|------------------|--------------|------------------------|
| 1    | Positive control | 13:45        | 87.2                   |
| 2    | 7                | na           | na                     |
| 3    | 8                | 12:45        | 87.3                   |
| 4    | 9                | 17:30        | 87.3                   |
| 5    | 10               | na           | na                     |
| 6    | 11               | 15:15        | 87.3                   |
| 7    | 12               | na           | na                     |
| 8    | Negative control | na           | na                     |

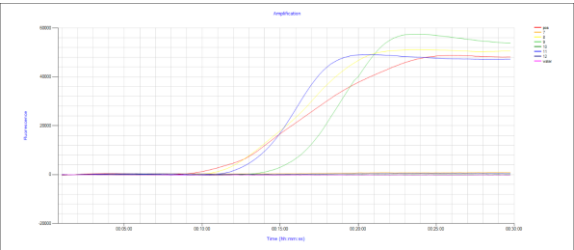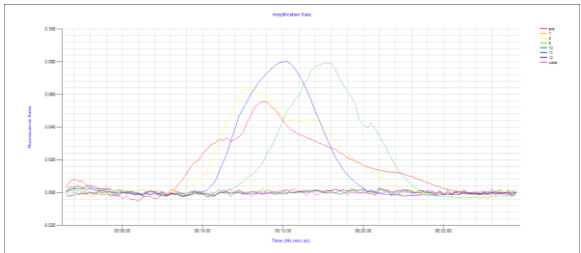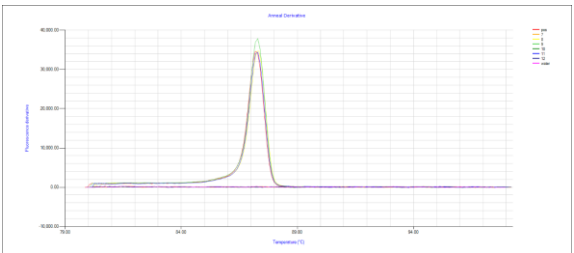

*B. exitiosa* actin LAMP assay. Samples 13-18. Run GEN2-1167\_0161 (B)

| Well | Sample           | Tp (min:sec) | Anneal derivative (°C) |
|------|------------------|--------------|------------------------|
| 1    | 13               | na           | na                     |
| 2    | 14               | 12:00        | 86.9                   |
| 3    | 15               | 13:40        | 86.8                   |
| 4    | 16               | na           | na                     |
| 5    | 17               | 12:00        | 86.8                   |
| 6    | 18               | 10:15        | 86.9                   |
| 7    | Positive control | 12:00        | 87                     |
| 8    | Negative control | na           | na                     |

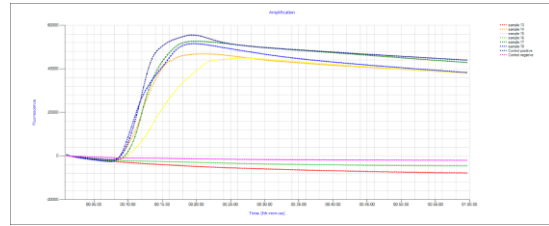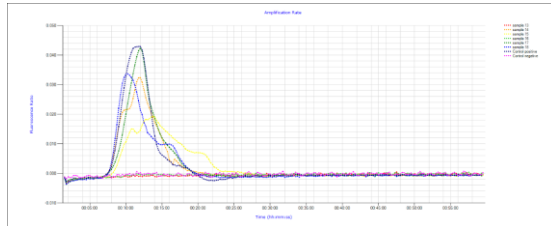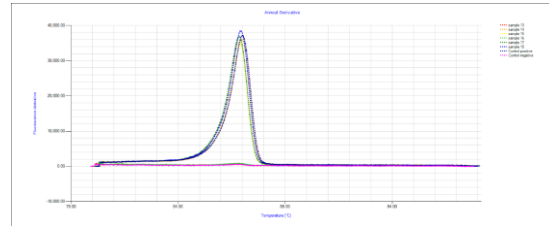

*B. exitiosa* actin LAMP assay. Samples 19-24. Run GEN2-1167\_0162

| Well | Sample           | TP (min:sec) | Anneal derivative (°C) |
|------|------------------|--------------|------------------------|
| 1    | 19               | na           | 87                     |
| 2    | 20               | na           | na                     |
| 3    | 21               | na           | na                     |
| 4    | 22               | na           | na                     |
| 5    | 23               | na           | na                     |
| 6    | 24               | na           | na                     |
| 7    | Positive control | 09:15        | na                     |
| 8    | Negative control | na           | na                     |

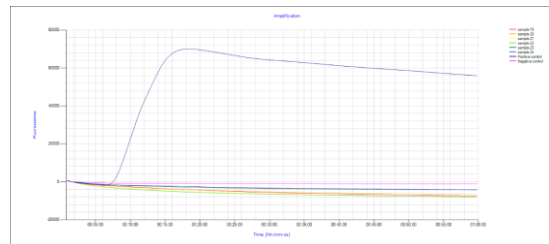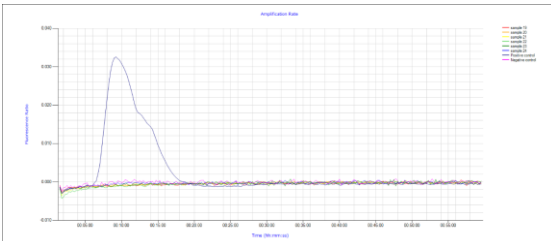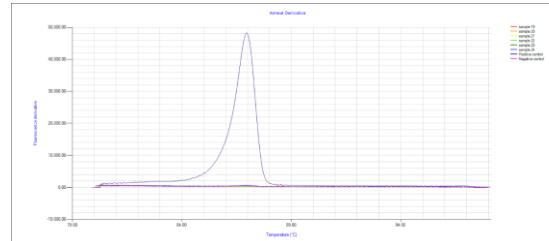

### C) Generic Bonamia 18S LAMP assay.

Generic Bonamia 18S LAMP assay. Samples 1-6. Run GEN3-1235\_0078

| Well | Sample           | Tp (min:sec) | Anneal derivative (°C) |
|------|------------------|--------------|------------------------|
| 1    | Positive control | 11:44        | 85.9                   |
| 2    | 1                | 11:59        | 85.9                   |
| 3    | 2                | na           | 85.9                   |
| 4    | 3                | 12:14        | 85.8                   |
| 5    | 4                | 11:44        | 85.7                   |
| 6    | 5                | na           | na                     |
| 7    | 6                | 09:59        | 85.9                   |
| 8    | Negative control | na           | na                     |

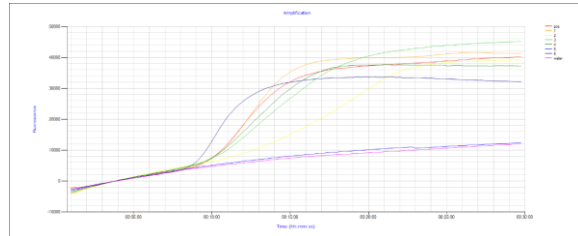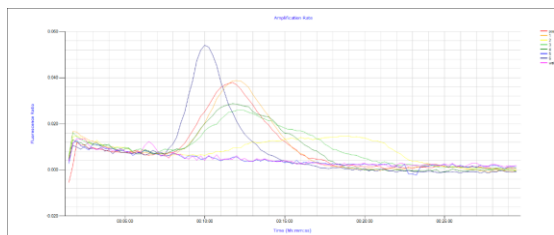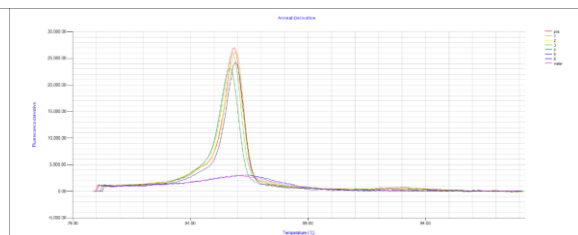

Generic Bonamia 18S LAMP assay. Samples 7-12. Run GEN3-1235\_0075

| Well | Sample           | Tp (min:sec) | Anneal derivative (°C) |
|------|------------------|--------------|------------------------|
| 1    | Positive control | 10:15        | 85.9                   |
| 2    | 7                | na           | na                     |
| 3    | 8                | 13:15        | 86.1                   |
| 4    | 9                | 12:30        | 86                     |
| 5    | 10               | 09:15        | 86                     |
| 6    | 11               | 10:00        | 86                     |
| 7    | 12               | na           | na                     |
| 8    | Negative control | na           | na                     |

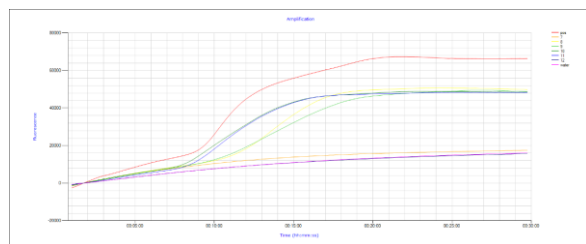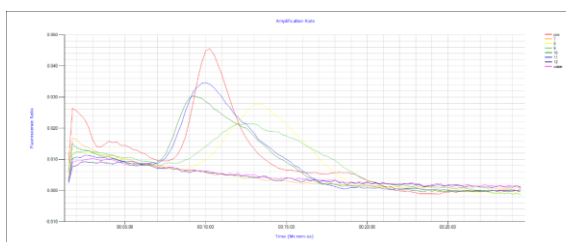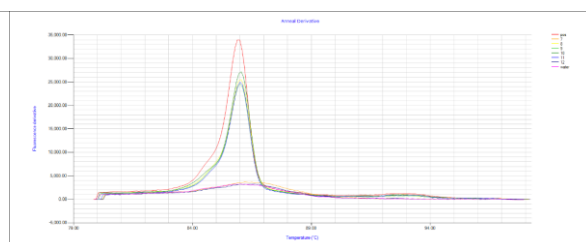

Generic Bonamia 18S LAMP assay. Samples 13-18. Run GEN3-1235\_0076

| Well | Sample           | Tp (min:sec) | Anneal derivative (°C) |
|------|------------------|--------------|------------------------|
| 1    | Positive control | 10:15        | 86                     |
| 2    | 13               | na           | na                     |
| 3    | 14               | 10:15        | 86.2                   |
| 4    | 15               | 10:00        | 86.1                   |
| 5    | 16               | 10:30        | 85.9                   |
| 6    | 17               | 09:30        | 85.9                   |
| 7    | 18               | 13:00        | 85.8                   |
| 8    | Negative control | na           | na                     |

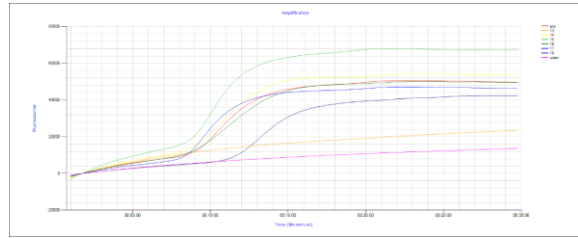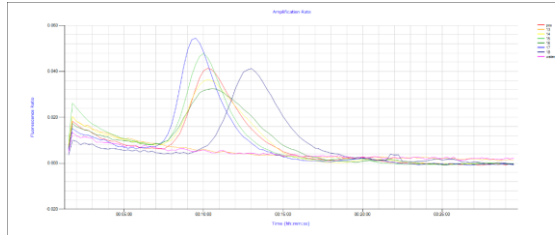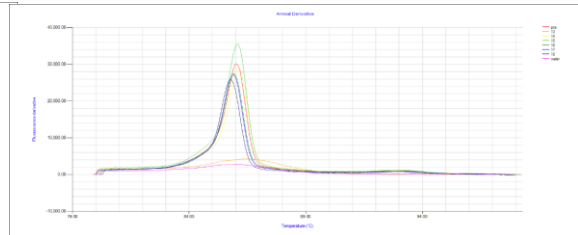

Generic Bonamia 18S LAMP assay. Samples 19-24. Run GEN3-1235\_0077

| Well | Sample           | Tp (min:sec) | Anneal derivative (°C) |
|------|------------------|--------------|------------------------|
| 1    | Positive control | 09:14        | 85.9                   |
| 2    | 19               | 09:29        | 86                     |
| 3    | 20               | na           | na                     |
| 4    | 21               | na           | na                     |
| 5    | 22               | na           | na                     |
| 6    | 23               | 10:14        | 86                     |
| 7    | 24               | 09:14        | 85.9                   |
| 8    | Negative control | na           | 0                      |

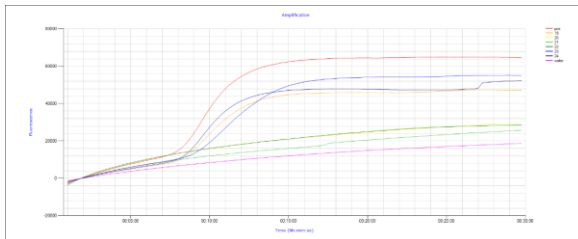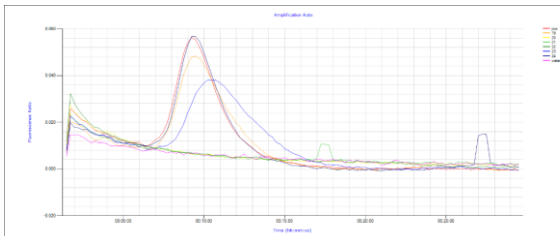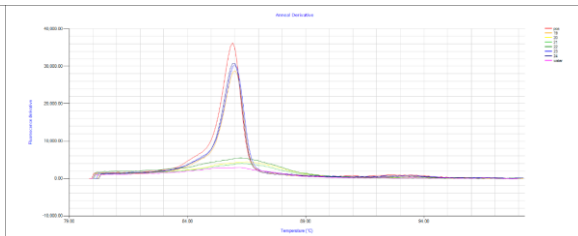

Supplement: s1 [file s1]
