# Supplementary material for: Loop-Mediated Isothermal Amplification for the Fast Detection of Bonamia ostreae and Bonamia exitiosa in Flat Oysters
Source: MDPI journal article supplement (doi:10.3390/pathogens13020132), 2024-01-30

**Figure S2.** Example of positivity tests on a Genie instrument to determine the product annealing curve temperature range for the *Bonamia ostreae actin 1* LAMP assay. a) Isothermal amplification of a range of infected and uninfected samples of *Ostrea edulis*. b) Anneal derivative of the isothermal amplified products showing the peaks in the  $89.68 \pm 0.13$  °C range. c) Electropherogram profile comparison of the samples included in the test analysed in a TapeStation. d) Gel image profile comparison in a TapeStation. Positive samples showed a high molecular band smear pattern. Ladder from 100 to 48500 bp. Positive samples: BO, VO, G3, 5M, 54, and D5; negative samples: VB.

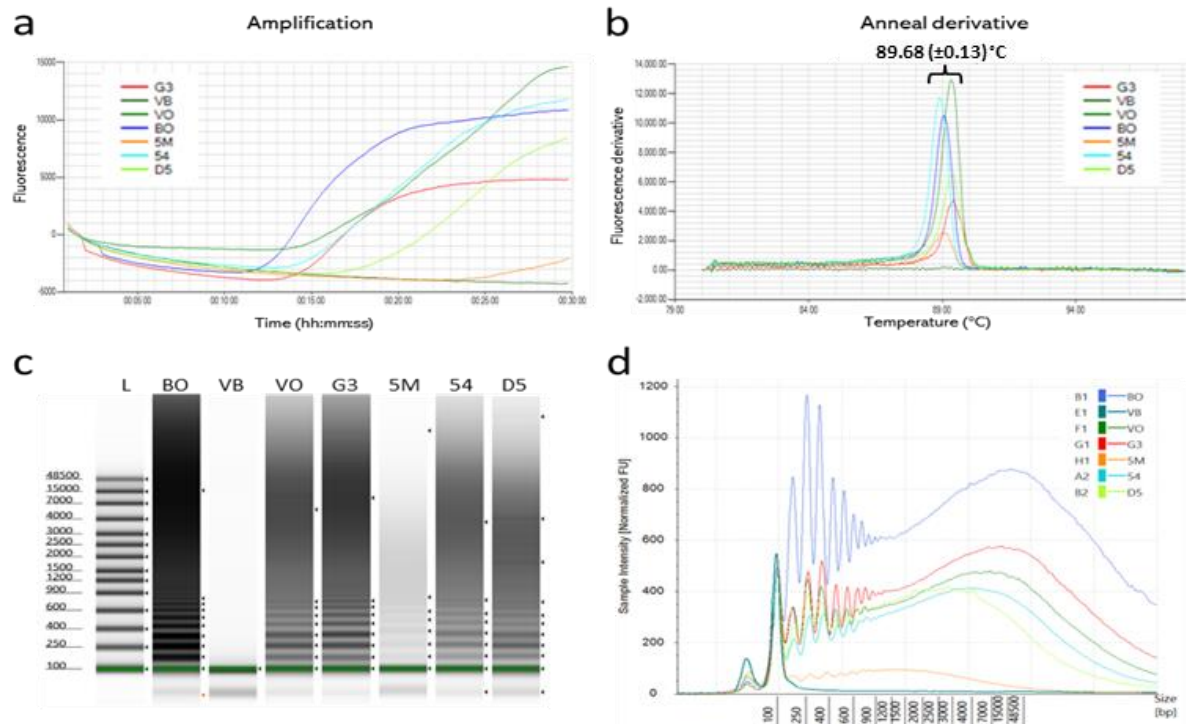

Supplement: s1 [file s1]
