# Supplementary material for: Loop-Mediated Isothermal Amplification for the Fast Detection of Bonamia ostreae and Bonamia exitiosa in Flat Oysters
Source: MDPI journal article supplement (doi:10.3390/pathogens13020132), 2024-01-30
Supplement: s1 [file s1]

**Figure S1.** Nucleotide alignment of partial gene sequences of the *actin* and *18S rRNA* genes of bonamia species, their oyster hosts, and other haplosporidian sequences available in GenBank (accessed in March 2022). The LAMP primers binding sites are highlighted as follows: outer primers F3 and B3 coloured in red; inner primers FIP (F1c + F2) and BIP (B1c + B2) boxed in yellow and green; and loop primers LoopF and LoopB boxed in red.

**A) *Bonamia exitiosa* *actin* gene alignment.**

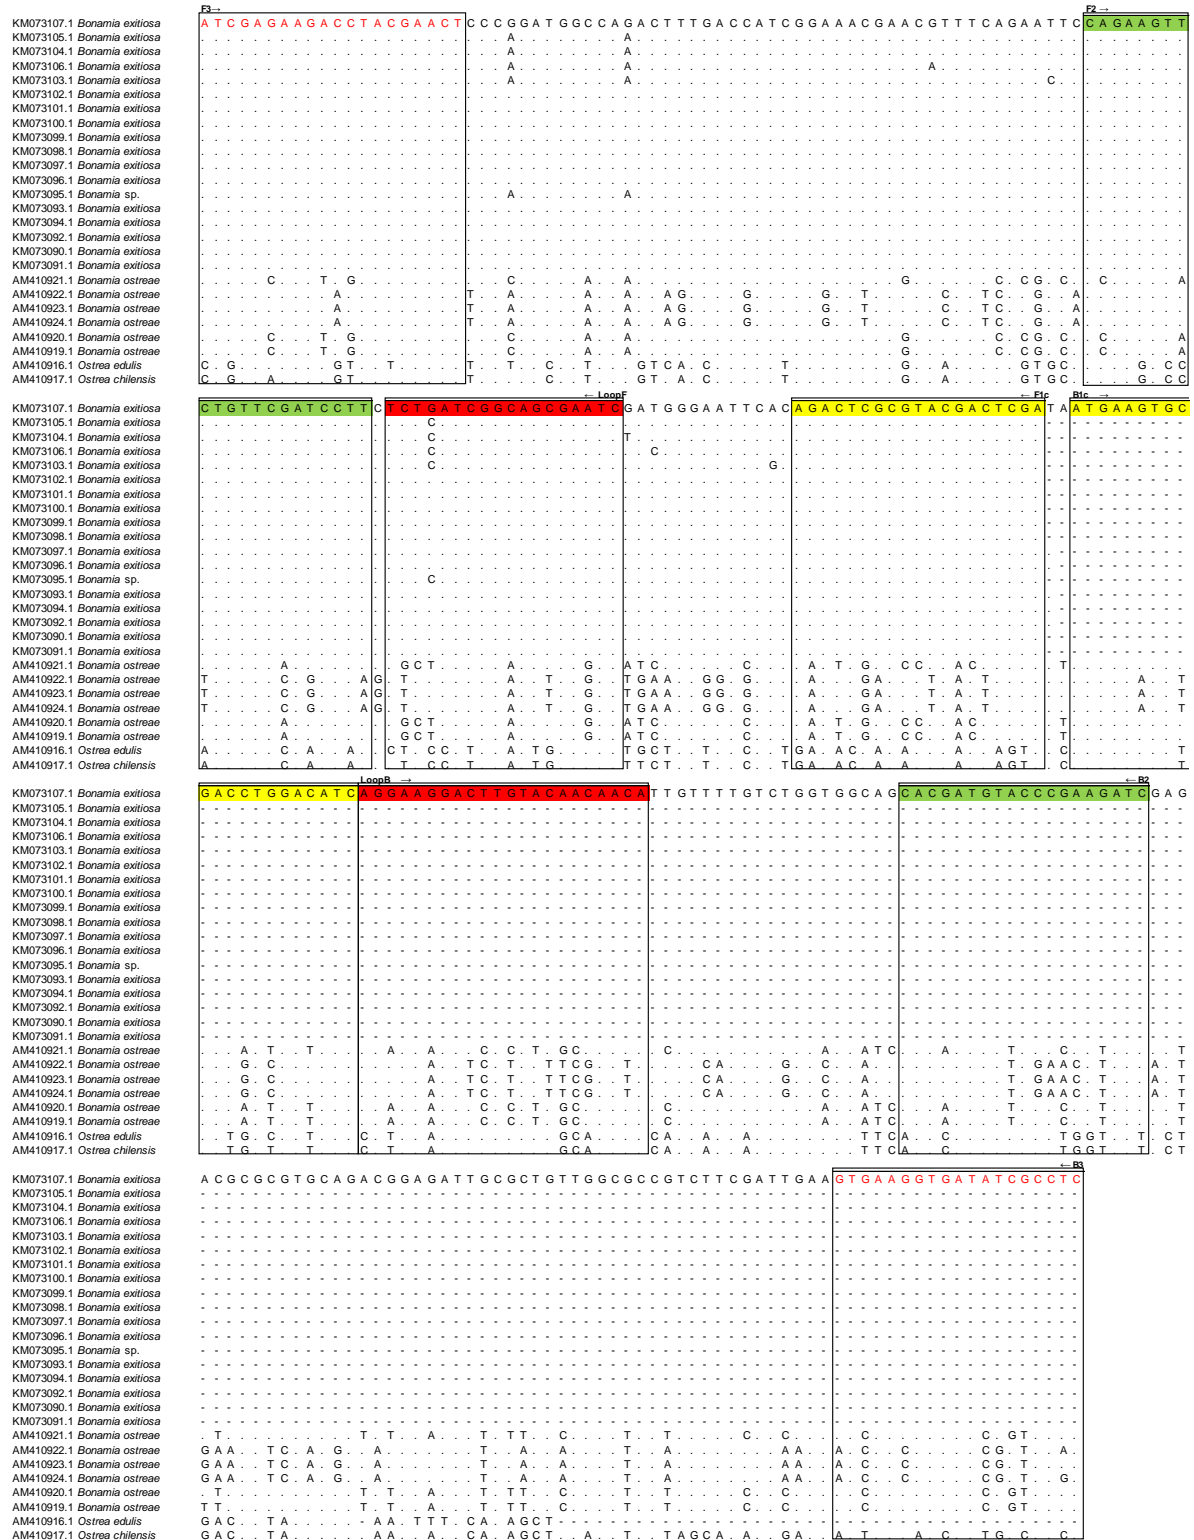

## b) *Bonamia ostreae* actin 1 gene alignment.

|                                    |                                           |                                                                                                             |
|------------------------------------|-------------------------------------------|-------------------------------------------------------------------------------------------------------------|
| AM410921.1 <i>Bonamia ostreae</i>  | T T C T T C A A C G A A C T G A G A G T C | G C C C C C G A A G A G C A C C C C G T C C T C C T C A C C G A G G C A C C G C T C A A T C C C A A A G C C |
| AM410922.1 <i>Bonamia ostreae</i>  |                                           |                                                                                                             |
| AM410923.1 <i>Bonamia ostreae</i>  |                                           |                                                                                                             |
| AM410924.1 <i>Bonamia ostreae</i>  |                                           |                                                                                                             |
| AM410920.1 <i>Bonamia ostreae</i>  |                                           |                                                                                                             |
| AM410919.1 <i>Bonamia ostreae</i>  |                                           |                                                                                                             |
| KM073107.1 <i>Bonamia exitiosa</i> |                                           |                                                                                                             |
| AM410916.1 <i>Ostrea edulis</i>    |                                           |                                                                                                             |
| AM410918.1 <i>Ostrea chilensis</i> |                                           |                                                                                                             |
| AM410917.1 <i>Ostrea chilensis</i> |                                           |                                                                                                             |

  

|                                    |                                                   |                                       |         |                                         |             |
|------------------------------------|---------------------------------------------------|---------------------------------------|---------|-----------------------------------------|-------------|
| AM410921.1 <i>Bonamia ostreae</i>  | A A T C G C G A G A A G A T G A C T C A G A T C A | G T T C G A G A C C T T C A A C A C C | C C C G | G G A T G T A C G T C G C C A T C C A A | G C G G T C |
| AM410922.1 <i>Bonamia ostreae</i>  |                                                   |                                       |         |                                         |             |
| AM410923.1 <i>Bonamia ostreae</i>  |                                                   |                                       |         |                                         |             |
| AM410924.1 <i>Bonamia ostreae</i>  |                                                   |                                       |         |                                         |             |
| AM410920.1 <i>Bonamia ostreae</i>  |                                                   |                                       |         |                                         |             |
| AM410919.1 <i>Bonamia ostreae</i>  |                                                   |                                       |         |                                         |             |
| KM073107.1 <i>Bonamia exitiosa</i> |                                                   |                                       |         |                                         |             |
| AM410916.1 <i>Ostrea edulis</i>    |                                                   |                                       |         |                                         |             |
| AM410918.1 <i>Ostrea chilensis</i> |                                                   |                                       |         |                                         |             |
| AM410917.1 <i>Ostrea chilensis</i> |                                                   |                                       |         |                                         |             |

  

|                                    |                 |                                       |     |                                   |                                           |             |
|------------------------------------|-----------------|---------------------------------------|-----|-----------------------------------|-------------------------------------------|-------------|
| AM410921.1 <i>Bonamia ostreae</i>  | C T C T C C C T | C T A C G C G T C C G G A A G A A C C | A C | G G A A T C G T C T T G G A C T C | G G A G A T G G C G T C A G C C A C A C C | G T C C C G |
| AM410922.1 <i>Bonamia ostreae</i>  |                 |                                       |     |                                   |                                           |             |
| AM410923.1 <i>Bonamia ostreae</i>  |                 |                                       |     |                                   |                                           |             |
| AM410924.1 <i>Bonamia ostreae</i>  |                 |                                       |     |                                   |                                           |             |
| AM410920.1 <i>Bonamia ostreae</i>  |                 |                                       |     |                                   |                                           |             |
| AM410919.1 <i>Bonamia ostreae</i>  |                 |                                       |     |                                   |                                           |             |
| KM073107.1 <i>Bonamia exitiosa</i> |                 |                                       |     |                                   |                                           |             |
| AM410916.1 <i>Ostrea edulis</i>    |                 |                                       |     |                                   |                                           |             |
| AM410918.1 <i>Ostrea chilensis</i> |                 |                                       |     |                                   |                                           |             |
| AM410917.1 <i>Ostrea chilensis</i> |                 |                                       |     |                                   |                                           |             |

  

|                                    |                         |                       |                                                 |
|------------------------------------|-------------------------|-----------------------|-------------------------------------------------|
| AM410921.1 <i>Bonamia ostreae</i>  | A T C T A C G A A G G A | T A T G C C C T T C C | T C A C G C C A T T C T G A G A T T G G A C A T |
| AM410922.1 <i>Bonamia ostreae</i>  |                         |                       |                                                 |
| AM410923.1 <i>Bonamia ostreae</i>  |                         |                       |                                                 |
| AM410924.1 <i>Bonamia ostreae</i>  |                         |                       |                                                 |
| AM410920.1 <i>Bonamia ostreae</i>  |                         |                       |                                                 |
| AM410919.1 <i>Bonamia ostreae</i>  |                         |                       |                                                 |
| KM073107.1 <i>Bonamia exitiosa</i> |                         |                       |                                                 |
| AM410916.1 <i>Ostrea edulis</i>    |                         |                       |                                                 |
| AM410918.1 <i>Ostrea chilensis</i> |                         |                       |                                                 |
| AM410917.1 <i>Ostrea chilensis</i> |                         |                       |                                                 |

## c) *Bonamia 18S rRNA* gene alignment.

|                                             |                                           |                                                                                                             |
|---------------------------------------------|-------------------------------------------|-------------------------------------------------------------------------------------------------------------|
| MZ305451.1 <i>Bonamia ostreae</i>           | G G T G A G A C T A A C T T A T G C G A A | A G C A T T C A C C A A G C G T G T T T T C T T T A A T C A A G A A C T A A A G T T G G G G G A T C G A A G |
| JN040832.1 <i>Bonamia ostreae</i>           |                                           |                                                                                                             |
| JN040831.1 <i>Bonamia ostreae</i>           |                                           |                                                                                                             |
| JQ936481.1 <i>Bonamia ostreae</i>           |                                           |                                                                                                             |
| AF262995.1 <i>Bonamia ostreae</i>           |                                           |                                                                                                             |
| AF192759.1 <i>Bonamia ostreae</i>           |                                           |                                                                                                             |
| JF831802.1 <i>Bonamia exitiosa</i>          |                                           |                                                                                                             |
| JF495410.1 <i>Bonamia exitiosa</i>          |                                           |                                                                                                             |
| JF831804.1 <i>Bonamia sp.</i>               |                                           |                                                                                                             |
| JF495408.1 <i>Bonamia sp.</i>               |                                           |                                                                                                             |
| JF831803.1 <i>Bonamia sp.</i>               |                                           |                                                                                                             |
| AY542903.2 <i>Bonamia sp.</i>               |                                           |                                                                                                             |
| GQ366703.1 <i>Bonamia sp.</i>               |                                           |                                                                                                             |
| AF337563.1 <i>Bonamia sp.</i>               |                                           |                                                                                                             |
| DQ312295.1 <i>Bonamia sp.</i>               |                                           |                                                                                                             |
| KC578009.1 <i>Bonamia sp.</i>               |                                           |                                                                                                             |
| EU016528.1 <i>Bonamia sp.</i>               |                                           |                                                                                                             |
| DQ356000.1 <i>Bonamia perspora</i>          |                                           |                                                                                                             |
| AY449710.1 <i>Minchinia tapetis</i>         |                                           |                                                                                                             |
| KY522823.1 <i>Minchinia sp.</i>             |                                           |                                                                                                             |
| KY522821.1 <i>Minchinia sp.</i>             |                                           |                                                                                                             |
| FJ518816.1 <i>Minchinia mercenariae</i>     |                                           |                                                                                                             |
| MK070859.1 <i>Haplosporidium sp.</i>        |                                           |                                                                                                             |
| AY449712.1 <i>Haplosporidium parasite</i>   |                                           |                                                                                                             |
| MK070858.1 <i>Minchinia mytili</i>          |                                           |                                                                                                             |
| MT311215.1 <i>Haplosporidium carcini</i>    |                                           |                                                                                                             |
| DQ653412.2 <i>Haplosporidia sp.</i>         |                                           |                                                                                                             |
| U20858.1 <i>Haplosporidium costale</i>      |                                           |                                                                                                             |
| DQ458793.1 <i>Haplosporidium edule</i>      |                                           |                                                                                                             |
| EF165631.1 <i>Minchinia sp.</i>             |                                           |                                                                                                             |
| HQ176469.1 <i>Haplosporidium raabei</i>     |                                           |                                                                                                             |
| AY449711.1 <i>Minchinia chitonis</i>        |                                           |                                                                                                             |
| KJ534587.1 <i>Haplosporidium patagon</i>    |                                           |                                                                                                             |
| MN104247.1 <i>Haplosporidium pinnae</i>     |                                           |                                                                                                             |
| U20319.1 <i>Minchinia terebinis</i>         |                                           |                                                                                                             |
| M2666334.1 <i>Haplosporidium costale</i>    |                                           |                                                                                                             |
| AY449713.1 <i>Haplosporidium lusitanicu</i> |                                           |                                                                                                             |
| HQ285783.1 <i>Haplosporidia sp.</i>         |                                           |                                                                                                             |
| M2666335.1 <i>Haplosporidium costale</i>    |                                           |                                                                                                             |
| MT367896.1 <i>Haplosporidium pinnae</i>     |                                           |                                                                                                             |
| U19538.2 <i>Haplosporidium nelsoni</i>      |                                           |                                                                                                             |
| AB080597.1 <i>Haplosporidium nelsoni</i>    |                                           |                                                                                                             |
| MT311214.1 <i>Haplosporidium cranc</i>      |                                           |                                                                                                             |
| X74131.1 <i>Haplosporidium nelsoni</i>      |                                           |                                                                                                             |
| DQ219484.1 <i>Haplosporidium montforti</i>  |                                           |                                                                                                             |
| MK142774.1 <i>Haplosporidium pinnae</i>     |                                           |                                                                                                             |
| MF621965.1 <i>Haplosporidium sp.</i>        |                                           |                                                                                                             |
| KT861000.1 <i>Pelagophyceae sp.</i>         |                                           |                                                                                                             |
| MW695753.1 <i>Uncultured_eukaryote</i>      |                                           |                                                                                                             |

|                                             | F2 → |   |   |   |   |   |   |   |   |   | ← LoopF |   |   |   |   |   |   |   |   |   |
|---------------------------------------------|------|---|---|---|---|---|---|---|---|---|---------|---|---|---|---|---|---|---|---|---|
|                                             | A    | C | G | A | T | C | A | G | A | T | C       | A | G | A | T | C | A | G | A | T |
| MZ305451.1 <i>Bonamia ostreae</i>           |      |   |   |   |   |   |   |   |   |   |         |   |   |   |   |   |   |   |   |   |
| JN040832.1 <i>Bonamia ostreae</i>           |      |   |   |   |   |   |   |   |   |   |         |   |   |   |   |   |   |   |   |   |
| JN040831.1 <i>Bonamia ostreae</i>           |      |   |   |   |   |   |   |   |   |   |         |   |   |   |   |   |   |   |   |   |
| JQ936481.1 <i>Bonamia ostreae</i>           |      |   |   |   |   |   |   |   |   |   |         |   |   |   |   |   |   |   |   |   |
| AF262995.1 <i>Bonamia ostreae</i>           |      |   |   |   |   |   |   |   |   |   |         |   |   |   |   |   |   |   |   |   |
| AF192759.1 <i>Bonamia ostreae</i>           |      |   |   |   |   |   |   |   |   |   |         |   |   |   |   |   |   |   |   |   |
| JF831802.1 <i>Bonamia exitiosa</i>          |      |   |   |   |   |   |   |   |   |   |         |   |   |   |   |   |   |   |   |   |
| JF495410.1 <i>Bonamia exitiosa</i>          |      |   |   |   |   |   |   |   |   |   |         |   |   |   |   |   |   |   |   |   |
| JF831804.1 <i>Bonamia</i> sp.               |      |   |   |   |   |   |   |   |   |   |         |   |   |   |   |   |   |   |   |   |
| JF495408.1 <i>Bonamia</i> sp.               |      |   |   |   |   |   |   |   |   |   |         |   |   |   |   |   |   |   |   |   |
| JF831803.1 <i>Bonamia</i> sp.               |      |   |   |   |   |   |   |   |   |   |         |   |   |   |   |   |   |   |   |   |
| AY542903.2 <i>Bonamia</i> sp.               |      |   |   |   |   |   |   |   |   |   |         |   |   |   |   |   |   |   |   |   |
| GQ366703.1 <i>Bonamia</i> sp.               |      |   |   |   |   |   |   |   |   |   |         |   |   |   |   |   |   |   |   |   |
| AF337563.1 <i>Bonamia</i> sp.               |      |   |   |   |   |   |   |   |   |   |         |   |   |   |   |   |   |   |   |   |
| DQ312295.1 <i>Bonamia</i> sp.               |      |   |   |   |   |   |   |   |   |   |         |   |   |   |   |   |   |   |   |   |
| KC578009.1 <i>Bonamia</i> sp.               |      |   |   |   |   |   |   |   |   |   |         |   |   |   |   |   |   |   |   |   |
| EU016528.1 <i>Bonamia</i> sp.               |      |   |   |   |   |   |   |   |   |   |         |   |   |   |   |   |   |   |   |   |
| DQ356000.1 <i>Bonamia perspora</i>          |      |   |   |   |   |   |   |   |   |   |         |   |   |   |   |   |   |   |   |   |
| AY449710.1 <i>Minchinia tapetis</i>         |      |   |   |   |   |   |   |   |   |   |         |   |   |   |   |   |   |   |   |   |
| KY522823.1 <i>Minchinia</i> sp.             |      |   |   |   |   |   |   |   |   |   |         |   |   |   |   |   |   |   |   |   |
| KY522821.1 <i>Minchinia</i> sp.             |      |   |   |   |   |   |   |   |   |   |         |   |   |   |   |   |   |   |   |   |
| FJ518816.1 <i>Minchinia mercenariae</i>     |      |   |   |   |   |   |   |   |   |   |         |   |   |   |   |   |   |   |   |   |
| MK070859.1 <i>Haplosporidium</i> sp.        |      |   |   |   |   |   |   |   |   |   |         |   |   |   |   |   |   |   |   |   |
| AY449712.1 <i>Haplosporidium</i> parasite   |      |   |   |   |   |   |   |   |   |   |         |   |   |   |   |   |   |   |   |   |
| MK070858.1 <i>Minchinia mytili</i>          |      |   |   |   |   |   |   |   |   |   |         |   |   |   |   |   |   |   |   |   |
| MT311215.1 <i>Haplosporidium carcini</i>    |      |   |   |   |   |   |   |   |   |   |         |   |   |   |   |   |   |   |   |   |
| DQ653412.2 <i>Haplosporidia</i> sp.         |      |   |   |   |   |   |   |   |   |   |         |   |   |   |   |   |   |   |   |   |
| U20858.1 <i>Haplosporidium costale</i>      |      |   |   |   |   |   |   |   |   |   |         |   |   |   |   |   |   |   |   |   |
| DQ458793.1 <i>Haplosporidium edule</i>      |      |   |   |   |   |   |   |   |   |   |         |   |   |   |   |   |   |   |   |   |
| EF165631.1 <i>Minchinia</i> sp.             |      |   |   |   |   |   |   |   |   |   |         |   |   |   |   |   |   |   |   |   |
| HQ176469.1 <i>Haplosporidium raabei</i>     |      |   |   |   |   |   |   |   |   |   |         |   |   |   |   |   |   |   |   |   |
| AY449711.1 <i>Minchinia chitonis</i>        |      |   |   |   |   |   |   |   |   |   |         |   |   |   |   |   |   |   |   |   |
| KJ534587.1 <i>Haplosporidium patagon</i>    |      |   |   |   |   |   |   |   |   |   |         |   |   |   |   |   |   |   |   |   |
| MN104247.1 <i>Haplosporidium pinnae</i>     |      |   |   |   |   |   |   |   |   |   |         |   |   |   |   |   |   |   |   |   |
| U20319.1 <i>Minchinia teredinis</i>         |      |   |   |   |   |   |   |   |   |   |         |   |   |   |   |   |   |   |   |   |
| MZ666334.1 <i>Haplosporidium costale</i>    |      |   |   |   |   |   |   |   |   |   |         |   |   |   |   |   |   |   |   |   |
| AY449713.1 <i>Haplosporidium lusitanicu</i> |      |   |   |   |   |   |   |   |   |   |         |   |   |   |   |   |   |   |   |   |
| HQ285783.1 <i>Haplosporidia</i> sp.         |      |   |   |   |   |   |   |   |   |   |         |   |   |   |   |   |   |   |   |   |
| MZ666335.1 <i>Haplosporidium costale</i>    |      |   |   |   |   |   |   |   |   |   |         |   |   |   |   |   |   |   |   |   |
| MT367896.1 <i>Haplosporidium pinnae</i>     |      |   |   |   |   |   |   |   |   |   |         |   |   |   |   |   |   |   |   |   |
| U19538.2 <i>Haplosporidium nelsoni</i>      |      |   |   |   |   |   |   |   |   |   |         |   |   |   |   |   |   |   |   |   |
| AB080597.1 <i>Haplosporidium nelsoni</i>    |      |   |   |   |   |   |   |   |   |   |         |   |   |   |   |   |   |   |   |   |
| MT311214.1 <i>Haplosporidium cranc</i>      |      |   |   |   |   |   |   |   |   |   |         |   |   |   |   |   |   |   |   |   |
| X74131.1 <i>Haplosporidium nelsoni</i>      |      |   |   |   |   |   |   |   |   |   |         |   |   |   |   |   |   |   |   |   |
| DQ219484.1 <i>Haplosporidium montforti</i>  |      |   |   |   |   |   |   |   |   |   |         |   |   |   |   |   |   |   |   |   |
| MK142774.1 <i>Haplosporidium pinnae</i>     |      |   |   |   |   |   |   |   |   |   |         |   |   |   |   |   |   |   |   |   |
| MF621965.1 <i>Haplosporidium</i> sp.        |      |   |   |   |   |   |   |   |   |   |         |   |   |   |   |   |   |   |   |   |
| KT861000.1 <i>Pelagophyceae</i> sp.         |      |   |   |   |   |   |   |   |   |   |         |   |   |   |   |   |   |   |   |   |
| MW695753.1 <i>Uncultured_eukaryote</i>      |      |   |   |   |   |   |   |   |   |   |         |   |   |   |   |   |   |   |   |   |

|                                             |                         |       |                             |                                               |
|---------------------------------------------|-------------------------|-------|-----------------------------|-----------------------------------------------|
| MZ305451.1 <i>Bonamia ostreae</i>           | <b>SGAATTGACGGAAGGG</b> | C A C | <b>CAC- AAGTTGTGGAGCCTG</b> | CGGCTTAATTTGATTCAACACGGGAAAACTTACCA <b>GG</b> |
| JN040832.1 <i>Bonamia ostreae</i>           |                         |       |                             |                                               |
| JN040831.1 <i>Bonamia ostreae</i>           |                         |       |                             |                                               |
| JQ936481.1 <i>Bonamia ostreae</i>           |                         |       |                             |                                               |
| AF262995.1 <i>Bonamia ostreae</i>           |                         |       |                             |                                               |
| AF192759.1 <i>Bonamia ostreae</i>           |                         |       |                             |                                               |
| JF831802.1 <i>Bonamia exitiosa</i>          |                         |       | A                           |                                               |
| JF495410.1 <i>Bonamia exitiosa</i>          |                         |       | A                           |                                               |
| JF831804.1 <i>Bonamia sp.</i>               |                         |       | A                           |                                               |
| JF495408.1 <i>Bonamia sp.</i>               |                         |       | A                           |                                               |
| JF831803.1 <i>Bonamia sp.</i>               | A                       |       | A A A                       | G A                                           |
| AY542903.2 <i>Bonamia sp.</i>               |                         |       | A                           |                                               |
| GQ366703.1 <i>Bonamia sp.</i>               |                         |       | A                           |                                               |
| AF337563.1 <i>Bonamia sp.</i>               |                         |       | A                           |                                               |
| DQ312295.1 <i>Bonamia sp.</i>               |                         |       | A                           |                                               |
| KC578009.1 <i>Bonamia sp.</i>               |                         |       | A                           |                                               |
| EU016528.1 <i>Bonamia sp.</i>               |                         |       | A                           |                                               |
| DQ356000.1 <i>Bonamia perspora</i>          |                         |       | A                           | G                                             |
| AY449710.1 <i>Minchinia tapetis</i>         |                         | C     | C                           |                                               |
| KY522823.1 <i>Minchinia sp.</i>             |                         | T A   | A                           | T                                             |
| KY522821.1 <i>Minchinia sp.</i>             |                         | T A   | A                           | T                                             |
| FJ518816.1 <i>Minchinia mercenariae</i>     |                         | T A   | A A                         | T                                             |
| MK070859.1 <i>Haplosporidium</i> sp.        | A                       |       | C A                         | C                                             |
| AY449712.1 <i>Haplosporidian parasite</i>   |                         | A     | T A                         | N                                             |
| MK070858.1 <i>Minchinia mytili</i>          |                         | A A   | A                           | C                                             |
| MT311215.1 <i>Haplosporidium carcini</i>    |                         | A     | C                           | C                                             |
| DQ653412.2 <i>Haplosporidia</i> sp.         |                         | A     | C A                         | G                                             |
| U20858.1 <i>Haplosporidium costale</i>      |                         |       | C                           | C                                             |
| DQ458793.1 <i>Haplosporidium edule</i>      |                         |       | C G                         | T G G                                         |
| EF165631.1 <i>Minchinia sp.</i>             | T                       |       | C                           | C                                             |
| HQ176469.1 <i>Haplosporidium raabei</i>     |                         |       | C A                         | T                                             |
| AY449711.1 <i>Minchinia chiltonis</i>       |                         |       | C                           | A                                             |
| KJ534587.1 <i>Haplosporidium patagon</i>    |                         |       | C                           | C                                             |
| MN104247.1 <i>Haplosporidium pinnae</i>     |                         |       | C G                         | C                                             |
| U20319.1 <i>Minchinia teredinis</i>         |                         | G A   | T G C                       | C                                             |
| MZ666334.1 <i>Haplosporidium costale</i>    |                         |       |                             | C                                             |
| AY449713.1 <i>Haplosporidium lusitanicu</i> |                         | A     | C A                         | C                                             |
| HQ285783.1 <i>Haplosporidia</i> sp.         | T                       |       | C                           | C A                                           |
| MZ666335.1 <i>Haplosporidium costale</i>    |                         |       | C                           | C                                             |
| MT367896.1 <i>Haplosporidium pinnae</i>     |                         |       | C G                         | C                                             |
| U19538.2 <i>Haplosporidium nelsoni</i>      | A                       |       | C A                         | C                                             |
| AB080597.1 <i>Haplosporidium nelsoni</i>    | A                       |       | C A                         | C                                             |
| MT311214.1 <i>Haplosporidium cranc</i>      |                         | A A   | T G                         | A                                             |
| X74131.1 <i>Haplosporidium nelsoni</i>      | A                       | C     | C                           | C                                             |
| DQ219484.1 <i>Haplosporidium montforti</i>  |                         |       | C G A                       | C                                             |
| MK142774.1 <i>Haplosporidium pinnae</i>     |                         |       | C                           | C                                             |
| MF621965.1 <i>Haplosporidium</i> sp.        |                         |       | C G                         | C                                             |
| KT861000.1 <i>Pelagophyceae</i> sp.         | A                       |       | C G A                       | C                                             |
| MW695753.1_Uncultured_eukaryote             |                         | T T   | G                           | C A                                           |

|                                             |                             |
|---------------------------------------------|-----------------------------|
| MZ305451.1 <i>Bonamia ostreae</i>           | <b>TCCAGACATAGTAAGGATTG</b> |
| JN040832.1 <i>Bonamia ostreae</i>           |                             |
| JN040831.1 <i>Bonamia ostreae</i>           |                             |
| JQ936481.1 <i>Bonamia ostreae</i>           |                             |
| AF262995.1 <i>Bonamia ostreae</i>           |                             |
| AF192759.1 <i>Bonamia ostreae</i>           |                             |
| JF831802.1 <i>Bonamia exitiosa</i>          |                             |
| JF495410.1 <i>Bonamia exitiosa</i>          |                             |
| JF831804.1 <i>Bonamia sp.</i>               |                             |
| JF495408.1 <i>Bonamia sp.</i>               |                             |
| JF831803.1 <i>Bonamia sp.</i>               | A                           |
| AY542903.2 <i>Bonamia sp.</i>               |                             |
| GQ366703.1 <i>Bonamia sp.</i>               |                             |
| AF337563.1 <i>Bonamia sp.</i>               |                             |
| DQ312295.1 <i>Bonamia sp.</i>               |                             |
| KC578009.1 <i>Bonamia sp.</i>               |                             |
| EU016528.1 <i>Bonamia sp.</i>               |                             |
| DQ356000.1 <i>Bonamia perspora</i>          |                             |
| AY449710.1 <i>Minchinia tapetis</i>         |                             |
| KY522823.1 <i>Minchinia sp.</i>             | G                           |
| KY522821.1 <i>Minchinia sp.</i>             | G                           |
| FJ518816.1 <i>Minchinia mercenariae</i>     | G                           |
| MK070859.1 <i>Haplosporidium</i> sp.        |                             |
| AY449712.1 <i>Haplosporidian parasite</i>   | C A                         |
| MK070858.1 <i>Minchinia mytili</i>          | A G                         |
| MT311215.1 <i>Haplosporidium carcini</i>    |                             |
| DQ653412.2 <i>Haplosporidia</i> sp.         |                             |
| U20858.1 <i>Haplosporidium costale</i>      | C                           |
| DQ458793.1 <i>Haplosporidium edule</i>      | A                           |
| EF165631.1 <i>Minchinia sp.</i>             | C                           |
| HQ176469.1 <i>Haplosporidium raabei</i>     | A T                         |
| AY449711.1 <i>Minchinia chiltonis</i>       |                             |
| KJ534587.1 <i>Haplosporidium patagon</i>    | C                           |
| MN104247.1 <i>Haplosporidium pinnae</i>     | G                           |
| U20319.1 <i>Minchinia teredinis</i>         | C A                         |
| MZ666334.1 <i>Haplosporidium costale</i>    | C                           |
| AY449713.1 <i>Haplosporidium lusitanicu</i> | C A G                       |
| HQ285783.1 <i>Haplosporidia</i> sp.         |                             |
| MZ666335.1 <i>Haplosporidium costale</i>    | C                           |
| MT367896.1 <i>Haplosporidium pinnae</i>     | G                           |
| U19538.2 <i>Haplosporidium nelsoni</i>      | A                           |
| AB080597.1 <i>Haplosporidium nelsoni</i>    | A                           |
| MT311214.1 <i>Haplosporidium cranc</i>      | C A                         |
| X74131.1 <i>Haplosporidium nelsoni</i>      | A                           |
| DQ219484.1 <i>Haplosporidium montforti</i>  | G G                         |
| MK142774.1 <i>Haplosporidium pinnae</i>     | G                           |
| MF621965.1 <i>Haplosporidium</i> sp.        | C G                         |
| KT861000.1 <i>Pelagophyceae</i> sp.         | C G                         |
| MW695753.1_Uncultured_eukaryote             | A T                         |
