# Supplementary material for: Loop-Mediated Isothermal Amplification for the Fast Detection of Bonamia ostreae and Bonamia exitiosa in Flat Oysters
Source: MDPI journal article supplement (doi:10.3390/pathogens13020132), 2024-01-30

**Figure S3.** Example of specificity tests of (A) *Bonamia ostreae* actin 1, (B) *B. exitiosa* actin, and (C) *Bonamia* sp. 18S LAMP assays on a Genie instrument. Each test was conducted with positive samples of *B. ostreae* (Bo), *B. exitiosa* (Be), and uninfected tissues of *Ostrea edulis* (Oe) and *Crassostrea gigas* (Cg). The isothermal amplification, the LAMP product anneal temperature, the electropherogram profile, and the gel image in a TapeStation are shown for each LAMP assay. Positive samples showed a high molecular band smear pattern corresponding to the amplification and concatenation of the LAMP product.

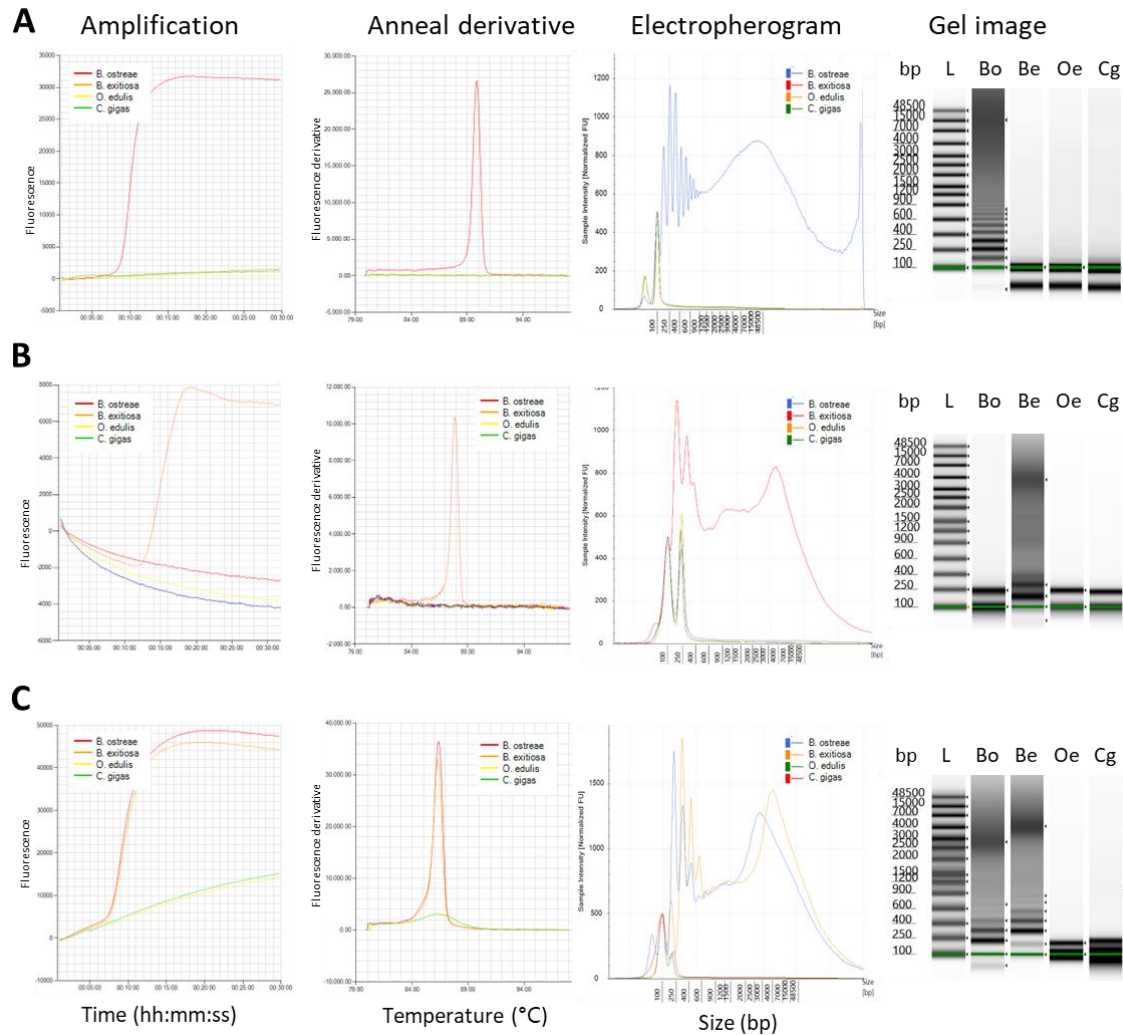

Supplement: s1 [file s1]
