# Supplementary material for: Loop-Mediated Isothermal Amplification for the Fast Detection of Bonamia ostreae and Bonamia exitiosa in Flat Oysters
Source: MDPI journal article supplement (doi:10.3390/pathogens13020132), 2024-01-30
Supplement: s1 [file s1]

**Table S1.** Set of 24 oyster gDNA samples used to assess the diagnostic accuracy of the three LAMP assays. The sample status: negative, positive (+), or strong positive (++), was established previously by Taqman PCR and conventional PCR.

| Pool | Replicates | Sample status                               | Sample ID |
|------|------------|---------------------------------------------|-----------|
| 1    | 1-1        | Negative                                    | 20        |
|      | 1-2        | Negative                                    | 21        |
|      | 1-3        | Negative                                    | 13        |
| 2    | 2-1        | Negative                                    | 7         |
|      | 2-3        | Negative                                    | 2         |
|      | 2-3        | Negative                                    | 5         |
| 3    | 3-1        | Negative                                    | 12        |
|      | 3-2        | Negative                                    | 22        |
| 4    | 4-1        | <i>B. exitiosa</i> ++                       | 17        |
|      | 4-2        | <i>B. exitiosa</i> ++                       | 11        |
|      | 4-3        | <i>B. exitiosa</i> ++                       | 4         |
| 5    | 5-1        | <i>B. exitiosa</i> +                        | 8         |
|      | 5-2        | <i>B. exitiosa</i> +                        | 9         |
|      | 5-3        | <i>B. exitiosa</i> +                        | 3         |
| 6    | 6-1        | <i>B. ostreae</i> ++                        | 6         |
|      | 6-2        | <i>B. ostreae</i> ++                        | 24        |
|      | 6-3        | <i>B. ostreae</i> ++                        | 19        |
| 7    | 7-1        | <i>B. ostreae</i> +                         | 23        |
|      | 7-2        | <i>B. ostreae</i> +                         | 16        |
|      | 7-3        | <i>B. ostreae</i> +                         | 10        |
| 8    | 8-1        | <i>B. ostreae</i> ++ & <i>B. exitiosa</i> + | 15        |
|      | 8-2        | <i>B. ostreae</i> ++ & <i>B. exitiosa</i> + | 14        |
| 9    | 9-1        | <i>B. exitiosa</i> ++ & <i>B. ostreae</i> + | 18        |
|      | 9-2        | <i>B. exitiosa</i> ++ & <i>B. ostreae</i> + | 1         |
